# Supplementary material for: Size reduction of cosolvent-infused microbubbles to form acoustically responsive monodisperse perfluorocarbon nanodroplets
Source: Royal Society of Chemistry journal article supplement (doi:10.1039/c5lc00315f), 2015-01-01
Supplement: c5lc00315f2.pdf [file c5lc00315f2.pdf]

## Supplementary Information

# Size Reduction of Cosolvent-Infused Microbubbles to Form Acoustically Responsive Monodisperse Perfluorocarbon Nanodroplets

Minseok Seo<sup>1</sup>, Ross Williams<sup>1</sup>, and Naomi Matsuura<sup>2\*</sup>

<sup>1</sup>Physical Sciences, Sunnybrook Research Institute

2075 Bayview Avenue, Toronto, ON, M4N 3M5, Canada

<sup>2</sup>Department of Medical Imaging, University of Toronto

<sup>3</sup>Department of Materials Science and Engineering, University of Toronto

263 McCaul St., Toronto, ON, M5T 1W7, Canada

\*E-mail: matsuura@sri.utoronto.ca

## Determination of DEE volume expansion coefficient from liquid to gas phase:

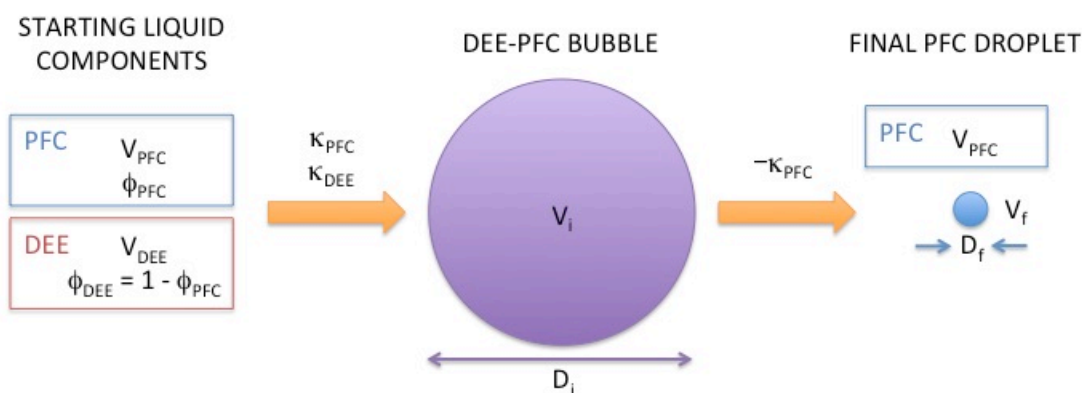

Where:

- $V_{PFC}$  = volume of PFC (liquid)
- $V_{DEE}$  = volume of DEE (liquid)
- $\phi_{PFC}$  = starting volume fraction of PFC
- $\kappa_{PFC}$  = volume expansion coefficient of PFC
- $\kappa_{DEE}$  = volume expansion coefficient of DEE
- $V_i$  = volume of initial DEE-PFC bubble
- $V_f$  = volume of final PFC droplet
- $D_i$  = diameter of initial DEE-PFC bubble
- $D_f$  = diameter of final PFC droplet

2/3

$$V_i = \frac{\pi}{6} D_i^3 = V_{PFC} \kappa_{PFC} + V_{DEE} \kappa_{DEE} + V_{mixture}$$

$$V_f = \frac{\pi}{6} D_f^3 = V_{PFC}$$

$$\frac{V_i}{V_f} = \kappa_{PFC} + \frac{V_{DEE}}{V_{PFC}} \kappa_{DEE} + \frac{V_{mixture}}{V_{PFC}}$$

Assuming that the volume of mixed PFC and DEE gas ( $V_{mixture}$ ) is small:

$$\frac{V_i}{V_f} = \kappa_{PFC} + \frac{1 - \phi_{PFC}}{\phi_{PFC}} \kappa_{DEE}$$

$$\frac{V_i}{V_f} = \kappa_{PFC} - \kappa_{DEE} + \kappa_{DEE} \frac{1}{\phi_{PFC}}$$

Thus, the volume expansion coefficient of DEE ( $\kappa_{DEE}$ ) can be extracted by plotting the experimental values of  $V_i/V_f$  versus the inverse of the volume fraction of PFC in the starting liquid, with the slope giving  $\kappa_{DEE}$  (Figure S1).

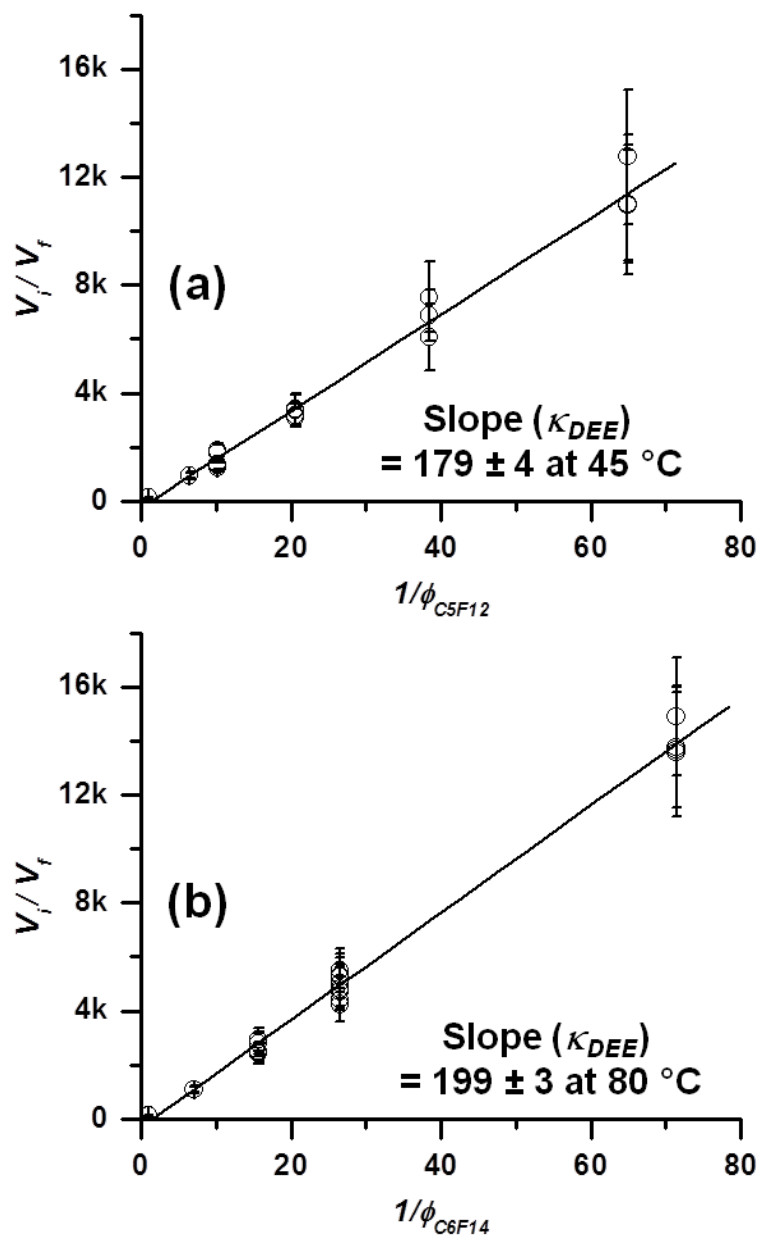

**Figure S1.**  $V_i/V_f$  of PFC droplets versus the inverse of the starting volume fraction of PFC ( $\phi_{PFC}$ ). DEE volume expansion coefficient ( $\kappa_{DEE}$ ) (a) at 45 °C (from  $C_5F_{12}$  data) and (b) at 80 °C (from  $C_6F_{14}$  data) were found from the slope of each plot.
